# Supplementary material for: Experience of implementing metagenomic next-generation sequencing in patients with suspected pulmonary infection in clinical practice
Source: Research Square preprint supplement (doi:10.21203/rs.3.rs-4397938/v1), 2024-05-21
Supplement: Supplementary file 1 [file 4c2aa1d1ba354bede7e7fbe9.xlsx]

## Sheet: Table S1
ID	Gender	Age	Underlying condition	Clinical manifestation	Hospitalization days	Responsible pathogens identified		Colonized pathogens identified by mNGS (specific read number)	Days from hospitalization to mNGS	Days of antibiotics administation before mNGS	Antibiotics adjustment	Clinical outcome
						by mNGS (specific read number)	by CMT
1	Male	64	Tumor	Cough, Expectoration, Shortness of breath	19	None	Negative	Aspergillus flavus(10), Fusarium fujikuroi species complex(42)	8	8	Yes (based on clinical experience)	Improve
2	Female	57	Hepatitis	Cough, Shortness of breath	24	None	Negative	Moraxella catarrhalis(4666)	1	4	No	Improve
3	Female	73	Diabetes mellitus, Hepatitis	Cough	13	Cryptococcus neoformans species complex(457)	Negative	None	2	2	Yes (based on mNGS)	Improve
4	Male	76	Cardiovascular diseases	Cough	16	None	Negative	None	9	1	No	Improve
5	Female	64	Tumor	Radiographic findings without overt symptoms	5	Mycobacterium tuberculosis complex(78)	Xpert MTB/RIF (+)	None	8	8	Yes (based on mNGS)	Improve
6	Female	72	Cardiovascular diseases	Cough, Asthma	24	Streptococcus pneumoniae(135476)	Negative	None	1	1	No	Deteriorate
7	Male	21	Chronic respiratory diseases	Cough, Expectoration, Hemoptysis	12	Mycobacterium avium complex(24), Pseudomonas aeruginosa(248842)	Negative	None	2	1	Yes (based on mNGS)	Improve
8	Male	42	Diabetes mellitus, Chronic respiratory diseases	Chest congestion, Cough	14	Staphylococcus aureus(8398)	Negative	Pneumocystis jirovecii(2)	2	2	No	Improve
9	Male	24	None	Hemoptysis	6	None	Xpert MTB/RIF (+)	None	4	4	Yes (based on CT)	Improve
10	Male	66	Cardiovascular diseases, Chronic respiratory diseases, Hypertension, Immunosuppression	Cough, Shortness of breath	22	Candida tropicalis(219259)	Negative	None	14	14	Yes (based on mNGS)	No change
11	Male	48	Chronic respiratory diseases	Hemoptysis	9	None	Negative	None	6	6	No	Improve
12	Male	54	None	Hemoptysis	4	None	Negative	None	2	2	No	Improve
13	Female	58	Tumor	Cough, Expectoration	7	None	Negative	Haemophilus influenzae(363)	4	4	No	Improve
14	Female	85	Hypertension	Cough, Expectoration	19	Stenotrophomonas maltophilia(97503)	Negative	Enterococcus faecium(179592)	8	8	Yes (based on mNGS)	Improve
15	Male	54	Chronic respiratory diseases	Cough, Expectoration, Hemoptysis	5	Aspergillus fumigatus(2297)	Negative	None	1	1	Yes (based on mNGS)	Improve
16	Male	71	Hypertension, Chronic respiratory diseases, Diabetes mellitus, Cardiovascular diseases	Chest pain, Shortness of breath, Cough	8	Mycobacterium tuberculosis complex(426799), Aspergillus niger(424)	AFB smear (+), Xpert MTB/RIF (+)	Enterobacter cloacae complex(38321), Klebsiella pneumoniae(3680), Trichosporon asahii(1993)	3	3	Yes (based on mNGS)	Improve
17	Male	50	Hypertension	Cough, Fever	16	None	Negative	None	6	6	No	Improve
18	Male	50	None	Cough, Expectoration	5	None	Negative	None	1	1	No	Improve
19	Male	55	None	Cough, Expectoration	11	None	Negative	None	2	2	No	Improve
20	Female	55	Diabetes mellitus	Chest pain	10	None	Negative	Haemophilus influenzae (1144)	3	3	Yes (based on clinical experience)	Improve
21	Male	76	Diabetes mellitus	Cough, Expectoration, Fever	13	Haemophilus influenzae(259485)	Negative	Streptococcus pneumoniae(1773)	5	5	No	Improve
22	Female	50	Chronic respiratory diseases	Hemoptysis	13	Haemophilus influenzae(966276)	Negative	None	5	5	No	Improve
23	Male	57	None	Cough, Expectoration, Dyspnea	10	None	Negative	Haemophilus influenzae (60)	3	3	No	Improve
24	Female	67	Chronic respiratory diseases	Hemoptysis, Cough, Expectoration	15	Pseudomonas aeruginosa(205494)	Negative	None	2	2	Yes (based on mNGS)	Improve
25	Female	26	None	Fever, Expectoration	19	Klebsiella pneumoniae(118)	Negative	Mycoplasma pneumoniae(3)	3	3	Yes (based on mNGS and clinical experience)	Improve
26	Female	41	Chronic respiratory diseases	Hemoptysis	11	Mycobacteroides abscessus(2551491)	Negative	None	3	3	Yes (based on mNGS)	Improve
27	Female	55	Chronic respiratory diseases	Cough	11	Mycobacterium avium complex(189182)	Negative	Mycobacteroides chelonae(737)	9	9	Yes (based on mNGS)	Improve
28	Male	43	Chronic respiratory diseases	Cough, Hemoptysis	5	Mycobacteroides abscessus(264315)	Negative	None	2	2	Yes (based on mNGS)	Improve
29	Female	42	None	Dyspnea	8	None	Negative	Haemophilus influenzae(119), Klebsiella pneumoniae(454)	2	2	Yes (based on clinical experience)	Improve
30	Female	48	Chronic respiratory diseases	Cough, Hemoptysis	8	Mycobacterium avium complex(11572)，Achromobacter ruhlandii(928865)	Negative	None	2	2	Yes (based on mNGS)	Improve
31	Male	55	Tumor	Chest pain, Fever	67	Cryptococcus neoformans species complex(25), Pneumocystis jirovecii(5)	Culture：Cryptococcus neoformans	None	7	5	Yes (based on CT and mNGS)	Improve
32	Female	67	Chronic respiratory diseases	Cough, Expectoration	16	Pseudomonas aeruginosa(2395287)	Culture：Pseudomonas aeruginosa	None	5	5	No	Improve
33	Male	63	Chronic respiratory diseases	Cough, Asthma	25	None	Negative	Legionella pneumophila(22)	17	17	Yes (based on clinical experience)	Improve
34	Male	74	Chronic respiratory diseases	Cough, Expectoration，Asthma	8	None	Negative	Pseudomonas aeruginosa(542), Staphylococcus aureus(64)	3	3	No	Improve
35	Female	80	Diabetes mellitus, Cardiovascular diseases, Hypertension	Fever, Cough	25	Pseudomonas aeruginosa(9048052)	Negative	Haemophilus influenzae(21), Escherichia coli(2454)	12	12	Yes (based on mNGS and clinical experience)	Improve
36	Male	43	Hypertension	Chest pain	11	None	Negative	None	5	4	Yes (based on clinical experience)	No change
37	Male	69	Diabetes mellitus, Cardiovascular diseases	Cough, Expectoration, Fever	9	None	Negative	None	2	6	No	Improve
38	Male	45	None	Cough, Expectoration	22	Cryptococcus neoformans species complex(16437)	Cryptococcus antigen (+)	Acinetobacter pittii(153), Klebsiella pneumoniae(25)	18	18	Yes (based on CT and mNGS)	Improve
39	Female	45	None	Cough, Expectoration	15	Pseudomonas aeruginosa(1212944)	Culture：Pseudomonas aeruginosa	None	3	15	Yes (based on CT and mNGS)	Improve
40	Male	40	None	Radiographic findings without overt symptoms	3	None	Negative	Haemophilus influenzae(89), Mycobacteroides chelonae(45)	0	0	No	Improve
41	Female	73	Hyperthyroidism	Cough, Expectoration	11	Haemophilus influenzae(458951)	Negative	Staphylococcus aureus(4547), Enterobacter cloacae complex(44274), Klebsiella pneumoniae(314)	6	6	No	Improve
42	Male	30	None	Cough	5	Mycobacterium tuberculosis complex(3775)	Xpert MTB/RIF (+)	Tropheryma whipplei(43395), Enterobacter cloacae complex(19257)	1	1	Yes (based on CT and mNGS)	Improve
43	Male	60	Chronic respiratory diseases, Hypertension, Rheumatoid arthritis	Cough, Expectoration, Shortness of breath	10	Mycobacterium tuberculosis complex(735), Aspergillus fumigatus (683)	Xpert MTB/RIF (+)	None	3	3	Yes (based on CT and mNGS)	Improve
44	Female	33	None	Cough	9	Pseudomonas aeruginosa(9899)	Culture：Pseudomonas aeruginosa	Haemophilus influenzae(17369), Streptococcus pneumoniae(6735)	3	3	No	Improve
45	Male	51	None	Fever	5	Mycobacterium tuberculosis complex(1430110)	AFB smear (+), Xpert MTB/RIF (+)	None	2	2	Yes (based on CT and mNGS)	Improve
46	Male	76	Hypertension	Cough, Expectoration, Shortness of breath	32	Aspergillus fumigatus(4), Acinetobacter baumannii(12)	Culture：Acinetobacter baumannii	None	3	3	Yes (based on mNGS)	Improve
47	Male	69	None	Fever	12	Klebsiella pneumoniae(7169)	Negative	Haemophilus influenzae(23)	2	2	Yes (based on mNGS)	Improve
48	Female	59	None	Shortness of breath, Chest congestion	4	Mycobacterium tuberculosis complex(289)	Xpert MTB/RIF (+)	Escherichia coli(40805)	2	2	Yes (based on CT and mNGS)	Improve
49	Female	55	None	Cough, Expectoration, Hemoptysis	11	Pseudomonas aeruginosa(8552429)	Culture：Pseudomonas aeruginosa	None	1	1	Yes (based on CT and mNGS)	Improve
50	Male	68	Chronic respiratory diseases	Shortness of breath, Fever, Chest pain	16	Klebsiella pneumoniae(439)	Negative	None	3	3	No	Improve
51	Male	90	Hypertension, Diabetes mellitus, Chronic respiratory diseases	Cough, Expectoration, Shortness of breath	15	Haemophilus influenzae(250)	Negative	Enterococcus avium(199654)	6	6	No	Improve
52	Male	30	None	Cough	13	Staphylococcus aureus(678)	Negative	None	3	3	Yes (based on mNGS)	No change
53	Female	68	Hepatitis	Cough, Expectoration, Asthma	19	Aspergillus fumigatus(88164), Mycobacterium avium complex(4530)	Culture：Pseudomonas aeruginosa, Aspergillus fumigatus	None	3	3	Yes (based on CT and mNGS)	Improve
54	Female	76	Hypertension, Cardiovascular diseases	Cough, Expectoration, Shortness of breath	2	Pseudomonas aeruginosa(7962841)	Culture：Pseudomonas aeruginosa	None	1	1	Yes (based on mNGS and clinical experience)	Improve
55	Male	34	None	Radiographic findings without overt symptoms	18	None	Negative	Haemophilus influenzae(875), Mycobacteroides chelonae(534)	13	13	No	No change
56	Female	69	Hypertension	Cough	6	None	Negative	None	2	2	No	Improve
57	Female	56	Hypertension, Immunosuppression	Cough, Expectoration	9	None	Negative	Haemophilus influenzae(1192)	4	4	No	Improve
58	Male	49	None	Fever, Cough, Expectoration	16	Coxiella burnetii(13)	Negative	Klebsiella aerogenes(3807)	4	4	Yes (based on mNGS)	Improve
59	Male	50	None	Cough, Expectoration, Shortness of breath	13	None	Negative	None	3	3	No	Improve
60	Male	27	None	Chest pain	31	None	Negative	Pseudomonas aeruginosa(20)	12	12	No	Improve
61	Male	62	None	Cough, Expectoration	6	Mycobacterium tuberculosis complex(3367704)	AFB smear (+), Xpert MTB/RIF (+)	None	4	4	Yes (based on mNGS)	No change
62	Male	64	Diabetes mellitus	Radiographic findings without overt symptoms	6	Mycobacterium tuberculosis complex(12)	Xpert MTB/RIF (+)	Haemophilus influenzae(7), Klebsiella pneumoniae(207), Moraxella catarrhalis(152), Staphylococcus aureus(36)	3	0	Yes (based on mNGS)	Improve
63	Male	41	Ankylosing spondylitis	Radiographic findings without overt symptoms	19	Mycobacterium tuberculosis complex(185)	Xpert MTB/RIF (+)	Haemophilus influenzae(2016), Staphylococcus aureus(6081), Pseudomonas aeruginosa(559)，Mycoplasma pneumoniae(11)	7	7	Yes (based on mNGS)	Improve
64	Female	72	None	Cough, Expectoration	9	Pseudomonas aeruginosa(430607)	Negative	None	2	2	Yes (based on mNGS)	Improve
65	Female	53	Chronic respiratory diseases	Cough, Asthma	23	Pseudomonas aeruginosa(731961)	Negative	None	9	8	Yes (based on clinical experience)	Improve
66	Male	62	None	Cough, Expectoration, Shortness of breath	9	Pseudomonas aeruginosa(5516793)	Culture：Pseudomonas aeruginosa	Elizabethkingia anophelis(9546), Escherichia coli(277)	8	8	Yes (based on CT and mNGS)	Improve
67	Female	61	None	Cough, Expectoration, Hemoptysis	16	Pseudomonas aeruginosa(1490917)	Culture：Pseudomonas aeruginosa	None	3	3	No	Improve
68	Male	65	Hepatitis	Cough, Expectoration	9	Haemophilus influenzae(418199), Mycobacterium avium complex(421)	Negative	None	3	3	Yes (based on mNGS)	Improve
69	Female	39	None	Cough	6	Mycobacterium tuberculosis complex(45)	Negative	Aspergillus niger(28)	1	1	Yes (based on mNGS)	Improve
70	Male	57	None	Cough	6	Mycobacterium tuberculosis complex(277)	Xpert MTB/RIF (+)	None	2	2	Yes (based on mNGS)	Improve
71	Female	63	Hypertension	Cough, Expectoration	9	None	Negative	Moraxella catarrhalis(187)	3	3	No	Improve
72	Male	18	None	Cough, Fever	8	None	Negative	None	5	5	Yes (based on clinical experience)	No change
73	Female	29	None	Cough, Expectoration, Chest pain	10	Mycobacterium tuberculosis complex(16)	Negative	None	7	7	Yes (based on mNGS)	Improve
74	Male	30	None	Cough, Expectoration	16	Prevotella melaninogenica(765746), Porphyromonas somerae(1157741)	Negative	None	5	5	Yes (based on mNGS)	Improve
75	Female	69	Hypertension	Chest congestion	17	None	Negative	Haemophilus influenzae(1254)	1	1	No	Improve
76	Female	41	None	Cough, Expectoration, Fever	19	Nocardia asiatica(26264), Aspergillus fumigatus(76)	Negative	None	6	6	Yes (based on mNGS)	Improve
77	Female	58	None	Cough, Expectoration, Shortness of breath	20	Pseudomonas aeruginosa(7755042)	Culture：Pseudomonas aeruginosa	Moraxella catarrhalis(37709)	1	1	Yes (based on CT and mNGS)	Improve
78	Male	65	Tumor	Cough, Expectoration	31	Mycobacteroides abscessus(8708)	Negative	Ochrobactrum anthropi(2098), Mycolicibacterium wolinskyi(1015)	27	27	Yes (based on mNGS)	Improve
79	Male	50	Cardiovascular diseases	Cough, Expectoration, Chest congestion	4	Mycobacterium tuberculosis complex(2909917)	AFB smear (+), Xpert MTB/RIF (+)	Aspergillus fumigatus(147)	2	2	Yes (based on mNGS)	Improve
80	Female	70	Hypertension, Diabetes mellitus	Cough	14	None	Negative	None	8	8	No	Improve
81	Female	74	None	Cough, Asthma	13	None	Negative	Acinetobacter baumannii(246)	7	7	No	Improve
82	Male	71	None	Cough, Expectoration	12	None	Negative	None	9	8	No	Improve
83	Male	39	Hepatic hemangioma	Cough, Expectoration, Chest pain	10	None	Negative	None	3	3	No	No change
84	Female	39	Tumor	Cough, Expectoration, Fever	20	None	Negative	None	4	4	Yes (based on clinical experience)	Improve
85	Female	57	Tumor	Cough, Expectoration	33	Haemophilus influenzae(177)	Negative	None	15	15	No	Improve
86	Male	60	Chronic respiratory diseases	Cough, Expectoration	4	Mycobacterium avium complex(11413)	Negative	None	3	3	No	Improve
87	Male	49	Diabetes mellitus	Cough, Chest pain, Asthma	15	None	Negative	None	6	6	Yes (based on clinical experience)	Improve
88	Male	52	None	Cough, Expectoration	22	Streptococcus pneumoniae(13532)	Negative	None	7	7	No	Improve
89	Female	49	None	Cough	12	Staphylococcus aureus(16501)	Negative	None	4	4	Yes (based on mNGS)	Improve
90	Female	66	Hypertension	Fever, Chest congestion	16	None	Negative	None	2	2	No	Improve
91	Male	77	Diabetes mellitus	Radiographic findings without overt symptoms	19	Mycobacterium tuberculosis complex(2437)	Xpert MTB/RIF (+)	None	9	9	Yes (based on mNGS)	Improve
92	Male	87	Tumor, Diabetes mellitus	Cough, Expectoration, Asthma	23	Stenotrophomonas maltophilia(254117), Nocardia terpenica(4035)	Culture：Stenotrophomonas maltophilia	Klebsiella pneumoniae(227)	3	3	Yes (based on mNGS)	Improve
93	Female	46	None	Cough, Expectoration, Fever	15	None	Negative	Staphylococcus aureus(169), Mycoplasma pneumoniae(109)	4	4	No	Improve
94	Male	53	None	Expectoration	18	None	Negative	Haemophilus influenzae(467)	3	3	No	Improve
95	Male	82	Cardiovascular diseases	Cough, Expectoration, Shortness of breath, Fever	18	Stenotrophomonas maltophilia(1120668)	Negative	Acinetobacter baumannii(12492), Candida albicans(2647628)	3	3	No	Improve
96	Male	80	Hypertension, Chronic respiratory diseases	Cough, Expectoration	16	Rhizopus delemar(289)	Negative	Klebsiella quasipneumoniae(41)	2	2	Yes (based on mNGS)	Improve
97	Female	52	None	Cough	9	Mycobacterium tuberculosis complex(107)	Xpert MTB/RIF (+)	None	11	11	Yes (based on mNGS)	Improve
